# Supplementary material for: Synthesis of nickel(ii) coordination polymers and conversion into porous NiO nanorods with excellent electrocatalytic performance for glucose detection
Source: Royal Society of Chemistry journal article supplement (doi:10.1039/c7ra00715a), 2017-01-01
Supplement: c7ra00715a1.pdf [file c7ra00715a1.pdf]

**Synthesis of nickel (II) coordination polymers and conversion  
into porous NiO nanorod with excellent electrocatalytic  
performance for glucose detection**

Changyun Chen, Mei Shi, Mengwei Xue, and Yaojuan Hu\*

School of Environmental Science, Nanjing Xiaozhuang University, Nanjing, 211171, P. R. China

E-mail: [huyaojuan@njxzc.edu.cn](mailto:huyaojuan@njxzc.edu.cn);

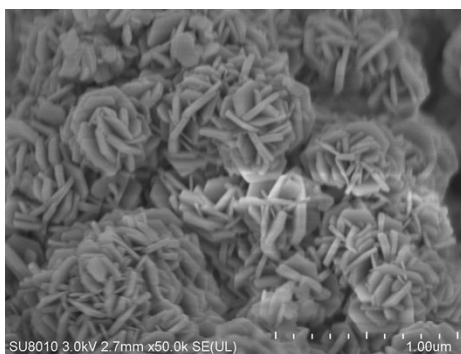

Fig. S1 SEM image of flower-like NiO nanostructures

For comparison, NiO nanocatalysts with different morphology were synthesized using solvothermal method. The morphologies of as-synthesized products were examined by SEM. Fig. S1 depicts the SEM image of the NiO products. The SEM image indicates that the NiO have flower-like hierarchical morphology. These flower-like architectures are assembled by several nanosheets and the surfaces of the nanosheets are smooth.

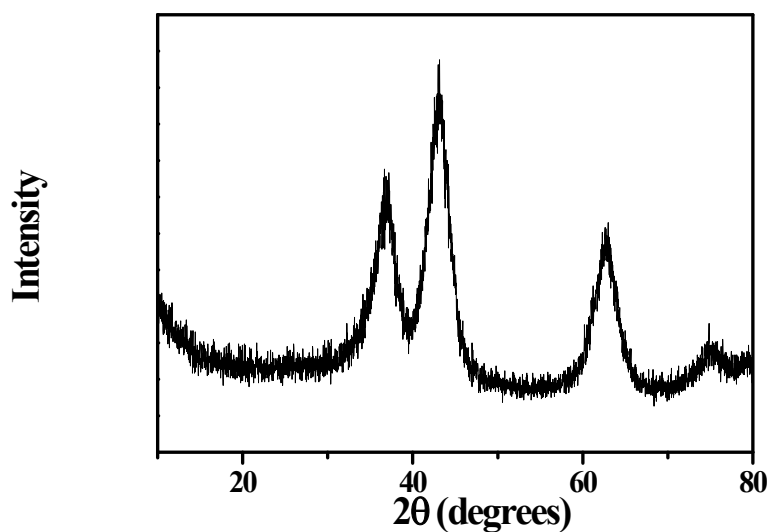

Fig. S2 XRD pattern of the as-obtained NiO nanostructures.

Fig S2 shows the XRD pattern of the flower-like NiO architectures. All the diffraction peaks can be indexed to the face-centered cubic (fcc) NiO phase, which is the same as the p-NiO nanorods.
